# Supplementary material
Source: Royal Society of Chemistry journal article supplement (https://www.rsc.org/suppdata/nj/1999/461/901925a.doc)
Supplement: Supplementary file 1 [file 901925a.doc]

**Supplementary Material**

**-Bonded organometallic building blocks for supramolecular chemistry**

# **Reinaldo Atencio, Lee Brammer,* Shiyue Fang, and F. Christopher Pigge**

Department of Chemistry, University of Missouri-St. Louis. 8001 Natural Bridge Road, St. Louis, MO 63121-4499, USA. Email: lee.brammer@umsl.edu

*Synthesis of* ***1****, adapted from ref. 11.*

A solution of KOH (130 mg; 2.32 mmol) in 10 mL of 5:1 THF/H2O was stirred and deoxygenated with a stream of dry nitrogen for 30 min. The complex [{(6-C6H5)(CO2Me)}Cr(CO)3] (275 mg; 1.01 mmol) was added and the mixture was stirred for ~4 h under N2. At this time TLC (3:1 hexane/Et2O) indicated complete consumption of starting material. Water and Et2O were added and the mixture transferred to a separatory funnel. The layers were separated and the aqueous phase was acidified to pH ~ 1-2 by the addition of 10% aqueous HCl solution. The resulting orange mixture was extracted with ether. The organic phases was dried over anhydrous MgSO4, filtered, and concentrated under reduced pressure to afford **1** (214mg, 82 %) as an orange crystalline solid.

*Crystallographic Data*

Crystallographic data for **1** and **2**•[*n*Bu2O] have been provided electronically in CIF format.

*Figures*

Figure S1. View of molecular structure of [Cr(6-C6H5CO2H)(CO)3], **1**, shown with 50% probability ellipsoids for non-hydrogen atoms and depicting atomic number scheme.

Figure S2. View of molecular structure of one the two crystallographically independent Cr{6-C6H3(CO2H)3}(CO)3]•[*n*Bu2O] units, **2**•[*n*Bu2O], shown with 50% probability ellipsoids for non-hydrogen atoms and depicting atomic number scheme.

Figure S3. View of molecular structure the other of the two crystallographically independent Cr{6-C6H3(CO2H)3}(CO)3]•[*n*Bu2O] units, **2**•[*n*Bu2O], shown with 50% probability ellipsoids for non-hydrogen atoms and depicting atomic number scheme.

Figure S4. (a) Packing arrangement in **1**, showing stacking arrangement of hydrogen-bonded dimers. (b) View of crystal structure of **1** showing C–H…O hydrogen bonding that links the O–H…O hydrogen-bonded dimers.

Figure S5. View of packing arrangement of **2•Bu2O** down the *b*-axis, along which the ribbons of **2** propagate. The bilayer structure is illustrated as well as the protrusion into this bilayer by the dibutylether molecules (green).

Figure S6. Alternative view of **2•Bu2O** similar to Figure 2, here showing ribbons of **2** in green and channels of dibutylether molecules in yellow

Figure S7. View of **2•Bu2O** showing ribbons of **2** from two adjacent bilayers (in green and pink, respectively). Ribbons and solvent channels (Bu2O molecules not shown) propagate along the *b*-axis (horizontally in this figure). Stacking takes place between the hydrogen-bonded rings of the carboxylic acids rings of one layer and the site of the carboxyl-ether hydrogen bond of the next layer.
